# Supplementary material for: New hybrid Cd(ii) compounds: synthesis and structural characterization
Source: Royal Society of Chemistry journal article supplement (doi:10.1039/c3dt53020e), 2014-01-01
Supplement: c3dt53020e.pdf [file c3dt53020e.pdf]

## Supporting materials

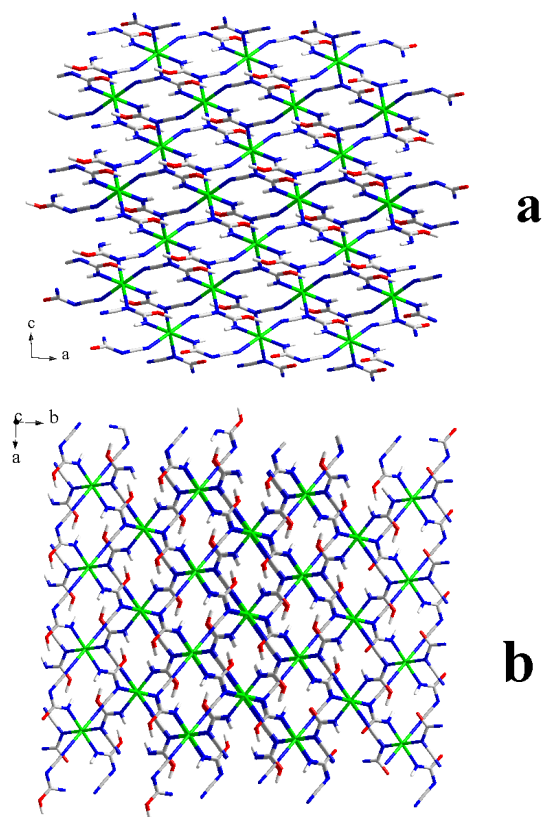

Fig. S1 The projection plots in (010) (a) and (001) directions (b) for compound 5.

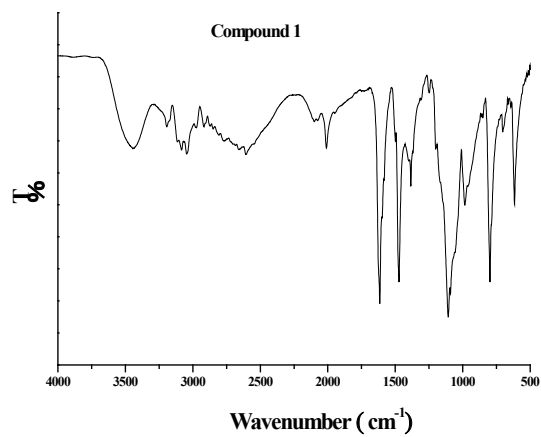

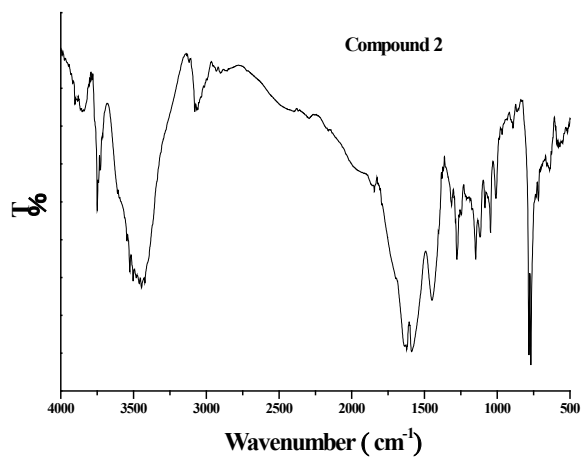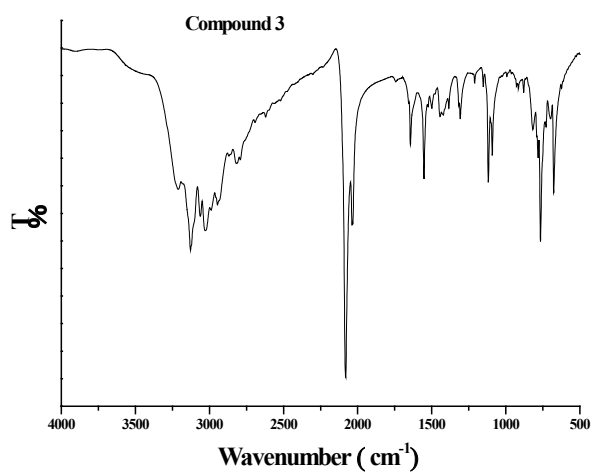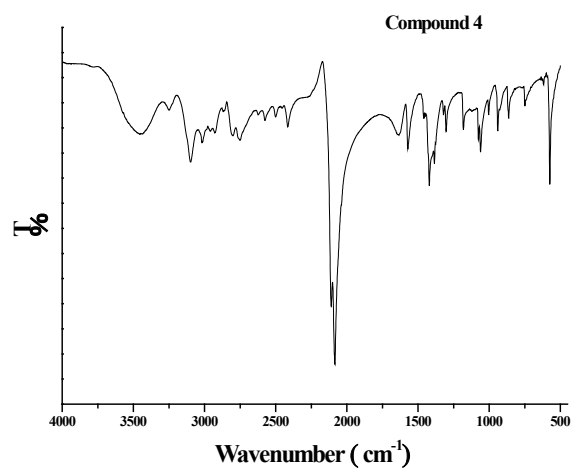

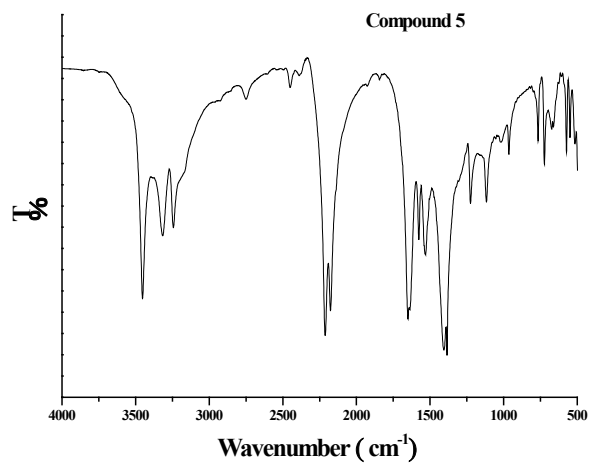

Fig. S2 The IR spectra of compounds 1-5.

**Note:** The weak peak at  $2011 \text{ cm}^{-1}$  in the IR spectrum of compound 1 should be irrelative to  $\text{SeCN}^+$ , because,  $\nu(\text{CN})$  is generally rather stronger, and larger than  $2050 \text{ cm}^{-1}$ .

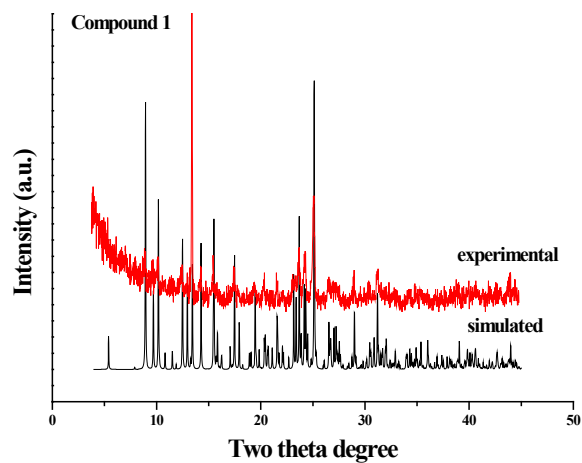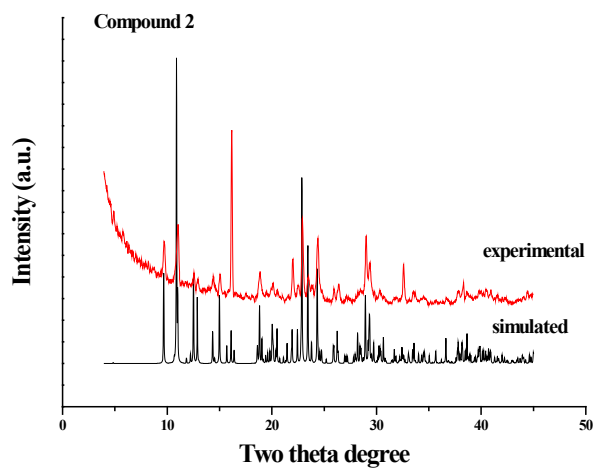

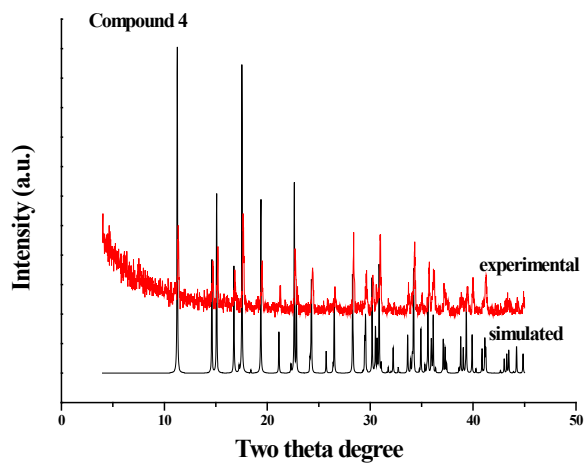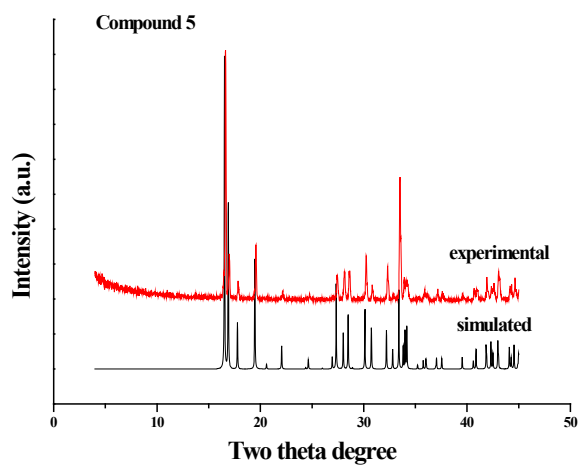

Fig. S3 The experimental (red) and simulated (black) powder XRD patterns for the title compounds.

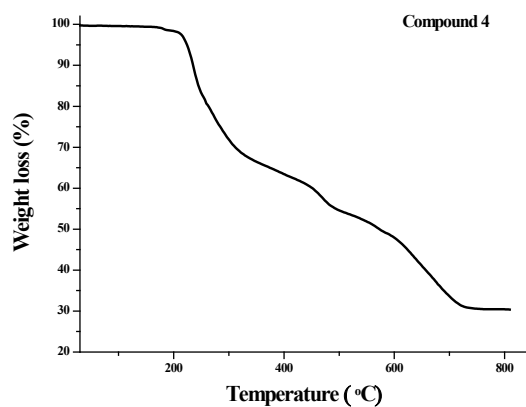

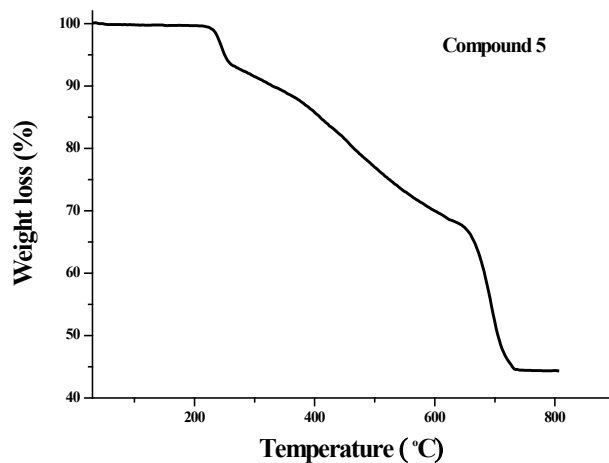

Fig. S4 The TG curves of compounds 4 and 5.

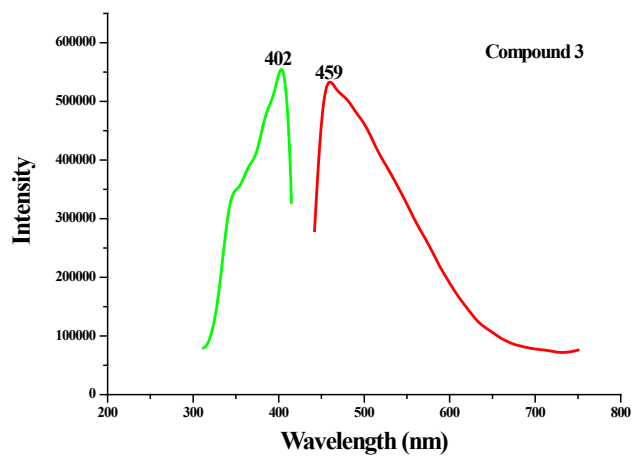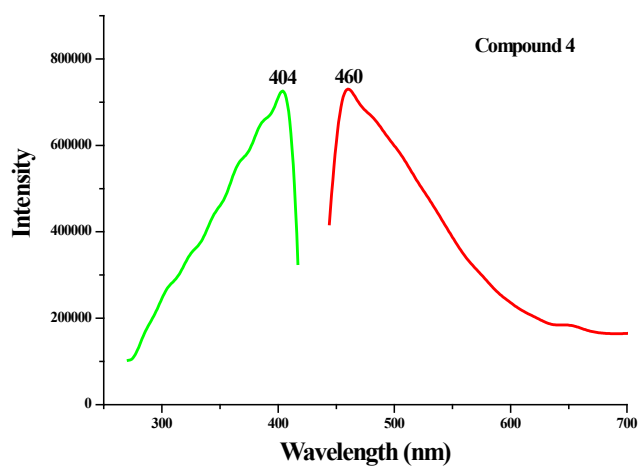

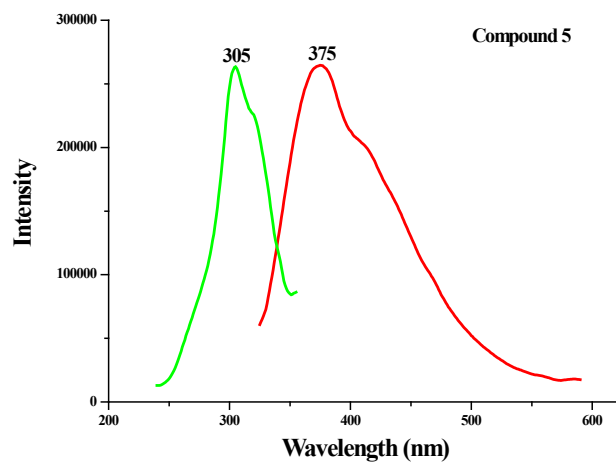

Fig. S5 The photoluminescence spectra of compounds 3, 4 and 5.

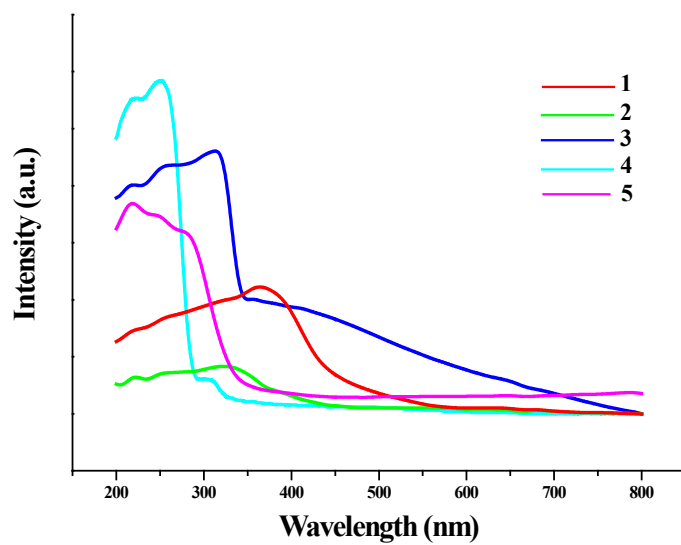

Fig. S6 The solid-state UV-vis spectra of the title compounds.

Note: Ultraviolet-visible (UV-vis) spectrum in the solid state was obtained on a Rigaku-UV-3100 spectrophotometer on a BaSO<sub>4</sub> plate.
